# Supplementary material for: Biomimic modification of graphene oxide
Source: Royal Society of Chemistry journal article supplement (doi:10.1039/c5nj02055g), 2015-01-01
Supplement: c5nj02055g1.pdf [file c5nj02055g1.pdf]

### **Biomimic Modification of Graphene Oxide**

Lihua Fu<sup>a,\*</sup>, Yingge Shi<sup>a,b</sup>, Ke Wang<sup>c</sup>, Ping Zhou<sup>b</sup>, Meiyong Liu<sup>b</sup>, Qing Wan<sup>b</sup>, Lei Tao<sup>c</sup>,  
Xiaoyong Zhang<sup>b,\*</sup>, Yen Wei<sup>c,\*</sup>

a Guangxi Key Laboratory of Petrochemical Resource Processing and Process Intensification Technology, School of Chemistry and Chemical Engineering, Guangxi University, Nanning 530004, China. b Department of Chemistry and Jiangxi Provincial Key Laboratory of New Energy Chemistry, Nanchang University, 999 Xuefu Avenue, Nanchang 330031, China. c Department of Chemistry and the Tsinghua Center for Frontier Polymer Research, Tsinghua University, Beijing, 100084, P. R. China.

Lihua Fu, Email: [lhfu@gxu.edu.cn](mailto:lhfu@gxu.edu.cn);

Xiaoyong Zhang, Email: [xiaoyongzhang1980@gmail.com](mailto:xiaoyongzhang1980@gmail.com);

Yen Wei, Email: [weiyen@tsinghua.edu.cn](mailto:weiyen@tsinghua.edu.cn);

## Results

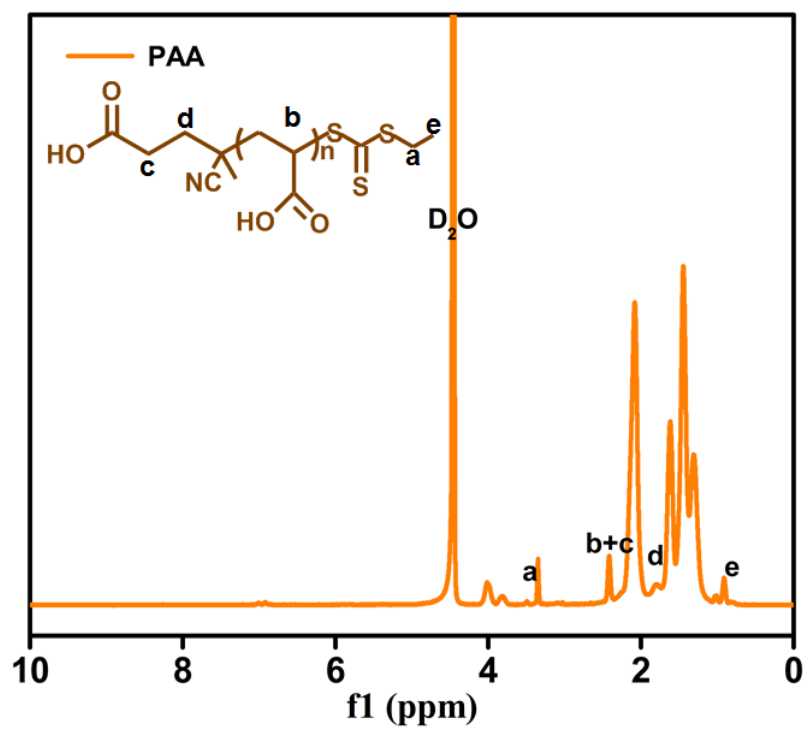

Fig. S1  $^1\text{H}$  NMR spectrum of PAA in  $\text{D}_2\text{O}$

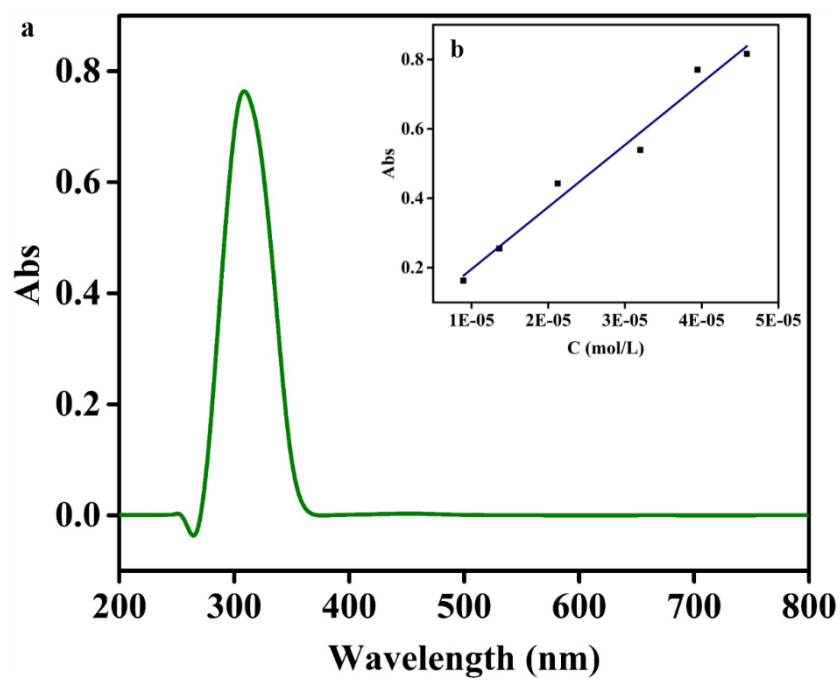

Fig. S2 The Uv-Vis spectrum of CTA (a) and the standard curve line of CTA at 302 nm.

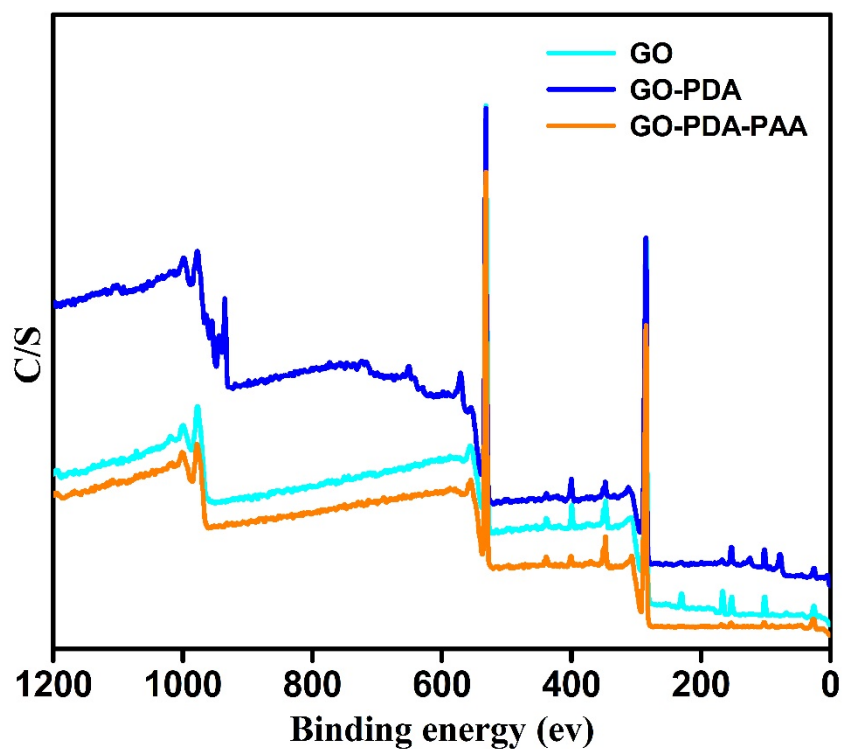

**Fig. S3** XPS survey spectra of GO, GO-PDA, GO-PDA-PAA, respectively

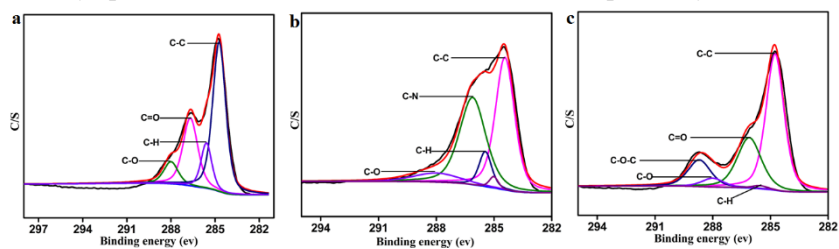

**Fig. S4** XPS C1s peak deconvolution of GO (a), GO-PDA (b), GO-PDA-PAA (c) and the assigned bonds
